# Supplementary material for: Enhanced Desulfurization Performance of ZIF−8/PEG MMMs: Effect of ZIF−8 Particle Size
Source: MDPI journal article supplement (doi:10.3390/membranes13050515), 2023-05-15
Supplement: s1 [file s1]

# Enhanced desulfurization performance of ZIF-8/PEG MMMs: Effect of ZIF-8 particle size

Xia Zhan<sup>a,b,\*</sup>, Kaixiang Gao<sup>a</sup>, Yucheng Jia<sup>a</sup>, Ning Liu<sup>a</sup>, Wen Deng<sup>a</sup>, Xuebin Guo<sup>a</sup>, Hehe Li<sup>a</sup>, Jiding Li<sup>c</sup>

(a. China Food Flavor and Nutrition Health Innovation Center, Beijing Technology and Business University, Beijing 100048, China; b. Key Laboratory of Cleaner Production and Integrated Resource Utilization of China National Light Industry, Beijing Technology and Business University, Beijing 100048, China; c. The State Key Laboratory of Chemical Engineering, Department of Chemical Engineering, Tsinghua University, Beijing 100084, PR China)

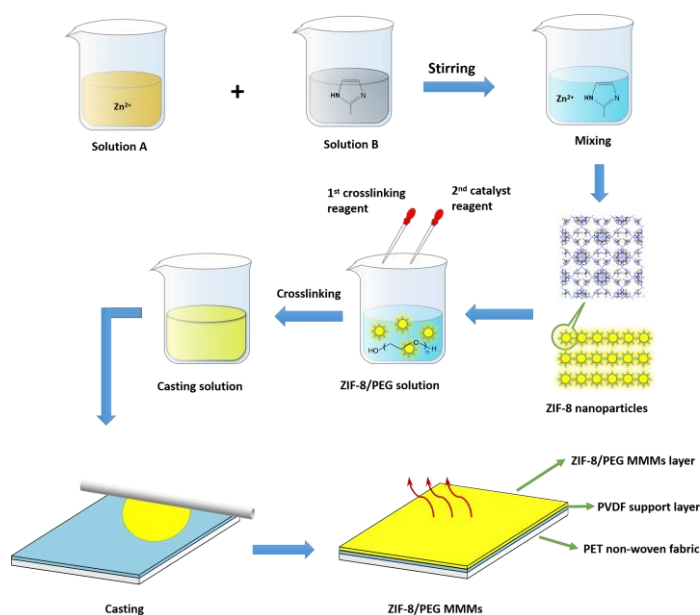

Fig.S1 Scheme diagram of preparation process of ZIF-8/PEG MMMs

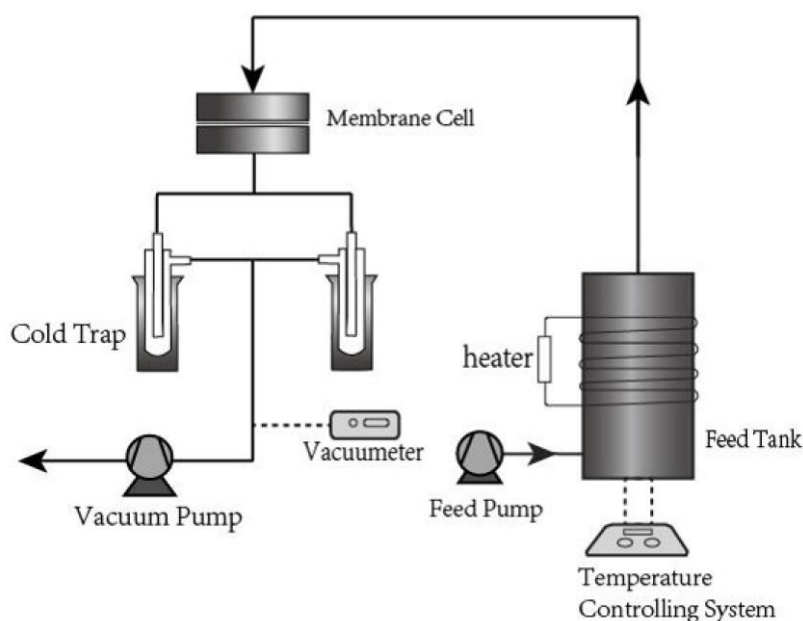

Fig.S2 Scheme diagram of pervaporation apparatus

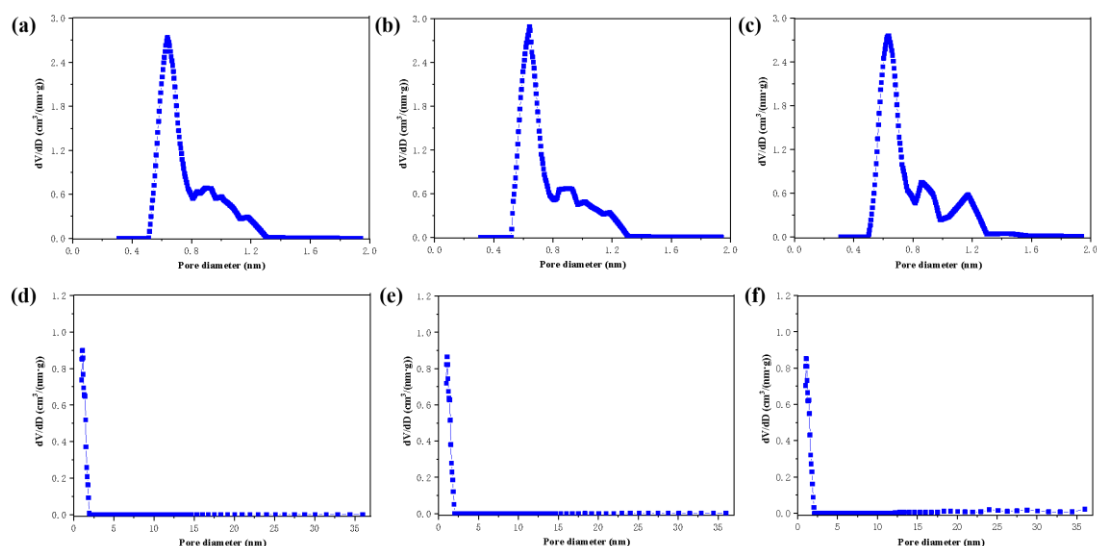

Fig.S3 Pore diameter distribution of ZIF-8 particles via HK(up) and DFT(down) analysis (a,d)ZIF-8-L; (b,e)ZIF-8-M; (c,f)ZIF-8-S

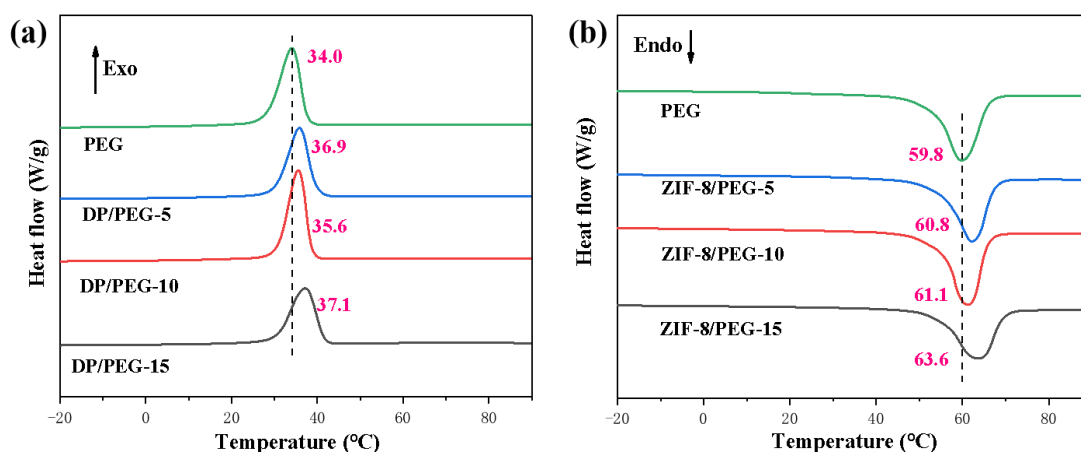

Fig.S4 DSC spectra of ZIF-8/PEG MMMs(a) Crystallization spectra (b) Melting spectra

Table S1 Synthesis conditions for ZIF-8 nanoparticle of different particle size

|                                      | ZIF-8(L) | ZIF-8(M) | ZIF-8(S) |
|--------------------------------------|----------|----------|----------|
| Zn <sup>2+</sup> concentration(mmol) | 0.01     | 0.01     | 0.01     |
| Hmim concentration(mmol)             | 0.02     | 0.03     | 0.04     |
| Solvent                              | Methanol | Methanol | Methanol |
| Reaction time(h)                     | 24       | 24       | 24       |
| Particle size(nm)                    | ~610     | ~270     | ~80      |
